# Supplementary material for: Efficient separation of phenols from oils via forming deep eutectic solvents
Source: Royal Society of Chemistry journal article supplement (doi:10.1039/c2gc35400d), 2012-01-01
Supplement: c2gc35400d.pdf [file c2gc35400d.pdf]

## Supplementary Information

### Efficient Separation of Phenols from Oils via Forming Deep Eutectic Solvents

Kun Pang<sup>a</sup>, Yucui Hou<sup>b</sup>, Weize Wu,<sup>\*a</sup> Wujie Guo<sup>a</sup>, Wei Peng<sup>a</sup>, Kenneth N. Marsh<sup>\*c</sup>

<sup>a</sup> State Key Laboratory of Chemical Resource Engineering, Beijing University of Chemical  
Technology, 100029, Beijing, China. Fax/ Tel: 86 10 64427603;

E-mail: wzwu@mail.buct.edu.cn

<sup>b</sup> Department of Chemistry, Taiyuan Normal University, 030031, Taiyuan, China.

<sup>c</sup> Centre for Energy, School of Mechanical and Chemical Engineering, The University of  
Western Australia, Crawley WA 6009, Australia;

E-mail: ken@mech.uwa.edu.au

#### Content:

Fig. S1 <sup>1</sup>H NMR spectra (600 MHz, rt, D<sub>2</sub>O) of (a) regenerated ChCl, (b) fresh ChCl.

Fig. S2 FT-IR spectra of (a) regenerated ChCl, (b) fresh ChCl.

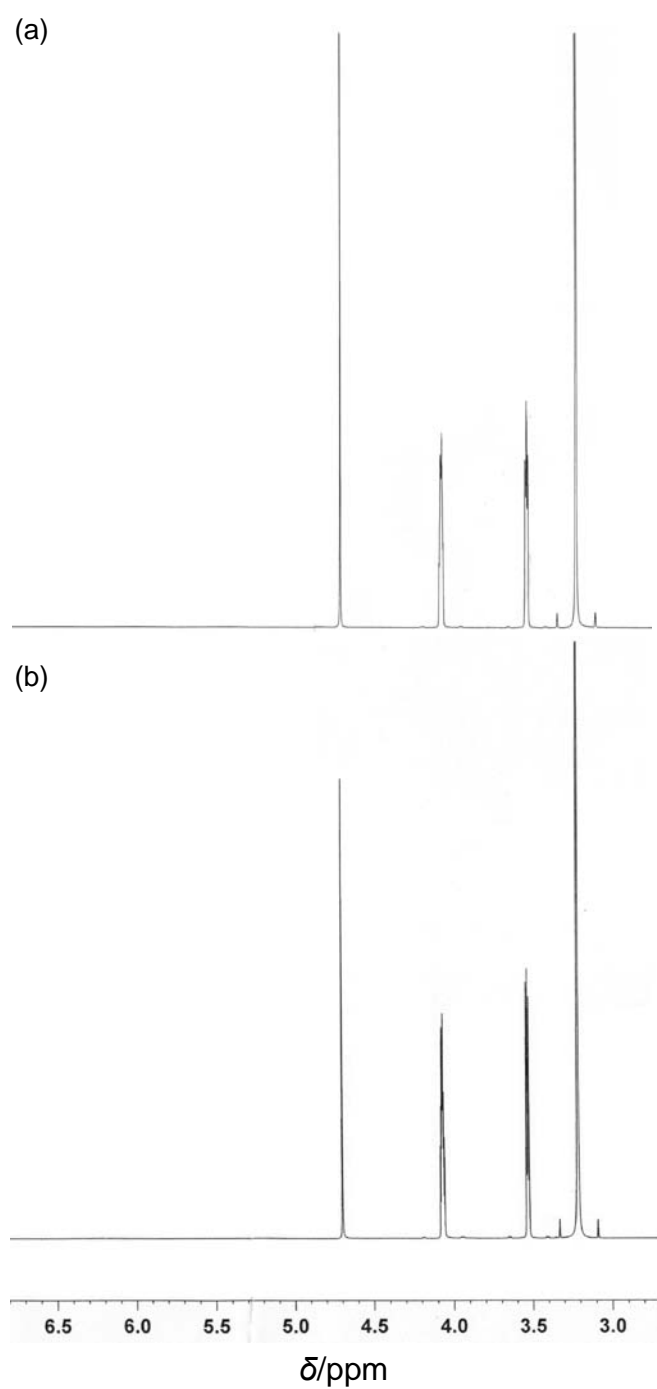

Fig. S1  $^1\text{H}$  NMR spectra (600 MHz, rt,  $\text{D}_2\text{O}$ ) of (a) regenerated ChCl, (b) fresh ChCl.

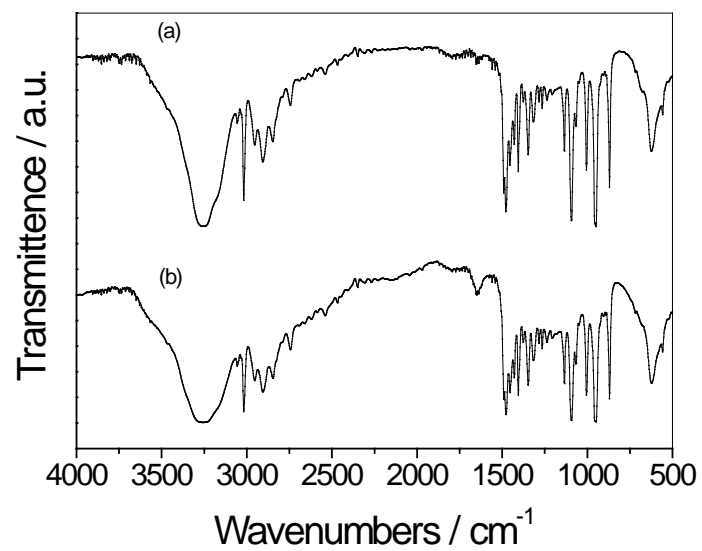

Fig. S2 FT-IR spectra of (a) regenerated ChCl, (b) fresh ChCl.
